# Supplementary material for: Pore control of Al-based MIL-53 isomorphs for the preferential capture of ethane in an ethane/ethylene mixture
Source: Royal Society of Chemistry journal article supplement (doi:10.1039/d1ta00366f), 2021-01-01
Supplement: d1ta00366f1.pdf [file d1ta00366f1.pdf]

## **Supporting Information**

### **Pore control of Al-based MIL-53 isomorphs for the preferential capture of ethane in an ethane/ethylene mixture**

Kyung Ho Cho<sup>a,b</sup>, Ji Woong Yoon<sup>a</sup>, Jeong Hyeon Lee<sup>c</sup>, Jin Chul Kim<sup>c</sup>, Kiwoong Kim<sup>a</sup>, U-Hwang Lee<sup>a</sup>, Minkee Choi<sup>b\*</sup>, Sang Kyu Kwak<sup>c\*</sup> and Jong-San Chang<sup>a,d\*</sup>

*<sup>a</sup>Research Group for Nanocatalysts and Chemical & Process Technology Division, Korea Research Institute of Chemical Technology (KRICT), Gajeong-Ro 141, Yuseong, Daejeon 34114, Republic of Korea; E-mail: jschang@kRICT.re.kr*

*<sup>b</sup>Department of Chemical and Biomolecular Engineering, Korea Advanced Institute of Science and Technology (KAIST), Daejeon 34141, Republic of Korea; E-mail: mkchoi@kaist.ac.kr*

*<sup>c</sup>Department of Energy Engineering, School of Energy and Chemical Engineering, Ulsan National Institute of Science and Technology (UNIST), 50 UNIST-gil, Ulju-gun, Ulsan 44919, Republic of Korea; E-mail: skkwak@unist.ac.kr*

*<sup>d</sup>Department of Chemistry, Sungkyunkwan University, Suwon 440-476, Republic of Korea*

## 1. Characterization of materials

Powder X-ray diffraction (PXRD) patterns were recorded on a Rigaku D/MAX-2200/PC diffractometer using graphite-monochromated CuK $\alpha$  radiation ( $\lambda = 1.5418 \text{ \AA}$ ). The XRD data were collected over the  $2\theta$  range from  $3^\circ$  to  $40^\circ$  with a step size of  $0.02^\circ$  and scan time of 4 s for each point at ambient temperature. High-temperature XRD data were measured on a Rigaku Ultima IVO equipped with a high-temperature cell under  $30 \text{ cm}^3 \text{ min}^{-1}$  He flow. Scanning electron microscopy (SEM) images were obtained using a Tescan Mira 3 LMU FEG at 10 kV acceleration voltage, after coating the samples with Pt for 2 min in a Quorum Q 150T ES. Thermogravimetric analysis (TG) was carried out using a Scinco TGA i-1000 under  $30 \text{ cm}^3 \text{ min}^{-1}$  N $_2$  flow with the ramping rate of  $5 \text{ K min}^{-1}$ . The C, H, N, and Al elemental compositions of the samples were determined by combining a Thermo Scientific FLASH 2000 series (EA analysis) and Thermo Scientific iCAP 6500 duo inductively coupled plasma-atomic emission spectrometer (ICP-AES).

## 2. Fitting of model equation of single component isotherms

The single-component C $_2$ H $_6$  adsorption isotherms of all MIL-53 isomorphs and C $_2$ H $_4$  adsorption isotherms of MIL-53-NDCA were fitted using the dual-site Langmuir-Freundlich (DSLFF) model to obtain the best fitting results. The dual-site Langmuir-Freundlich (DSLFF) equation is expressed by Eq. (S1):

$$q_i = q_{m1,i} \frac{K_{1,i} P^{n_A}}{1 + K_{1,i} P^{n_A}} + q_{m2,i} \frac{K_{2,i} P^{n_B}}{1 + K_{2,i} P^{n_B}}, \text{ where } K_{n,i} = K_{n,i}^0 \exp\left(-\frac{\Delta H_n}{RT}\right) \quad (\text{S1})$$

where  $q_i$  is the uptake at equilibrium ( $\text{mol kg}^{-1}$ ),  $R$  is the universal gas constant ( $\text{J mol}^{-1} \text{ K}^{-1}$ ),  $P$  is the equilibrium pressure (bar);  $q_{m1,i}$  and  $q_{m2,i}$  are the saturation capacities of sites 1 and 2 ( $\text{mol kg}^{-1}$ ) of component  $i$ ;  $K_{1,i}^0$  and  $K_{2,i}^0$  are the affinity coefficients of site 1 and 2 of component  $i$  ( $\text{bar}^{-1}$ );  $\Delta H_n$  is energy parameter of site 1 and site 2 ( $\text{kJ mol}^{-1}$ ); and  $n_A$  and  $n_B$  are equal to  $1/n_1$  and  $1/n_2$ , respectively, where  $n_1$  and  $n_2$  are the respective deviations from the ideal homogeneous surface. The single-component C $_2$ H $_4$  adsorption isotherms of MIL-53-BDC and MIL-BPDC were fitted using the Langmuir-Freundlich (LF) model Eq. (S2):

$$q_i = q_{m1,i} \frac{K_{l,i} P^{n_A}}{1 + K_{l,i} P^{n_A}}, \text{ where } K_{n,i} = K_{n,i}^0 \exp\left(-\frac{\Delta H_n}{RT}\right) \quad (\text{S2})$$

### 3. Isosteric heats of adsorption

The isosteric heat of adsorption was calculated from the isotherms collected at three different temperatures (273, 283 and 293 K) by Eq. (S3):

$$Q_{\text{st}} = R \left( \frac{\partial \ln P}{\partial \left( \frac{1}{T} \right)} \right)_q \quad (\text{S3})$$

where  $Q_{\text{st}}$  is the isosteric heat of adsorption ( $\text{kJ mol}^{-1}$ ),  $R$  is the universal gas constant ( $\text{J mol}^{-1} \text{K}^{-1}$ ),  $P$  and  $T$  represent pressure (bar) and temperature (K), respectively, and  $q$  is the adsorption amount per weight of the adsorbent ( $\text{mol kg}^{-1}$ ).

### 4. Prediction of IAST selectivity

The ideal adsorbed solution theory (IAST) was developed by Myers and Prausnitz to predict the adsorption equilibria in multi-component gas mixture adsorption.<sup>1,2</sup> The adsorption parameters calculated using the DSLF or LF equation were used for the calculation of the IAST selectivity, as expressed in Eq. (S4):

$$S = \frac{X_1}{X_2} \times \frac{Y_2}{Y_1} \quad (\text{S4})$$

,where  $X_1$  and  $X_2$  are the mole fractions of the adsorbed  $\text{C}_2\text{H}_6$  and  $\text{C}_2\text{H}_4$ , respectively, while  $Y_1$  and  $Y_2$  are the partial pressures of the  $\text{C}_2\text{H}_6$  and  $\text{C}_2\text{H}_4$  in a gas mixture.

### 5. Productivity of $\text{C}_2\text{H}_4$

Because the total gas flow rate changes during the breakthrough experiment due to the dynamic adsorption/desorption of  $C_2H_6$  and  $C_2H_4$ , the time-dependent gas flow rate was separately recorded using a mass flow meter (see the breakthrough setup in Fig. S8). Then, it was multiplied with the time-dependent  $C/C_0$  profiles (Fig. 5) to calculate the absolute amount of flowed  $C_2H_6$  and  $C_2H_4$  (Fig. S10). The  $C_2H_4$  productivity was defined by the breakthrough amount of ethylene (defined as a volume of gas at STP) over an adsorbent bed packed with 1 kg of MOF. The breakthrough amount was calculated by the integration of the breakthrough curves during a period from  $t_1$  to  $t_2$  during which the  $C_2H_4$  purity is kept higher than a threshold value of 99.95%. The productivity of  $C_2H_4$  is expressed by Eq. (S5)

$$Productivity\ of\ C_2H_4\ (\frac{L}{kg}) = \frac{\int_{t_1}^{t_2} F_{C_2H_4} dt}{Weight\ of\ adsorbent} \quad (S5)$$

, where  $F_{C_2H_4}$  is the outlet flow rate of  $C_2H_4$ .

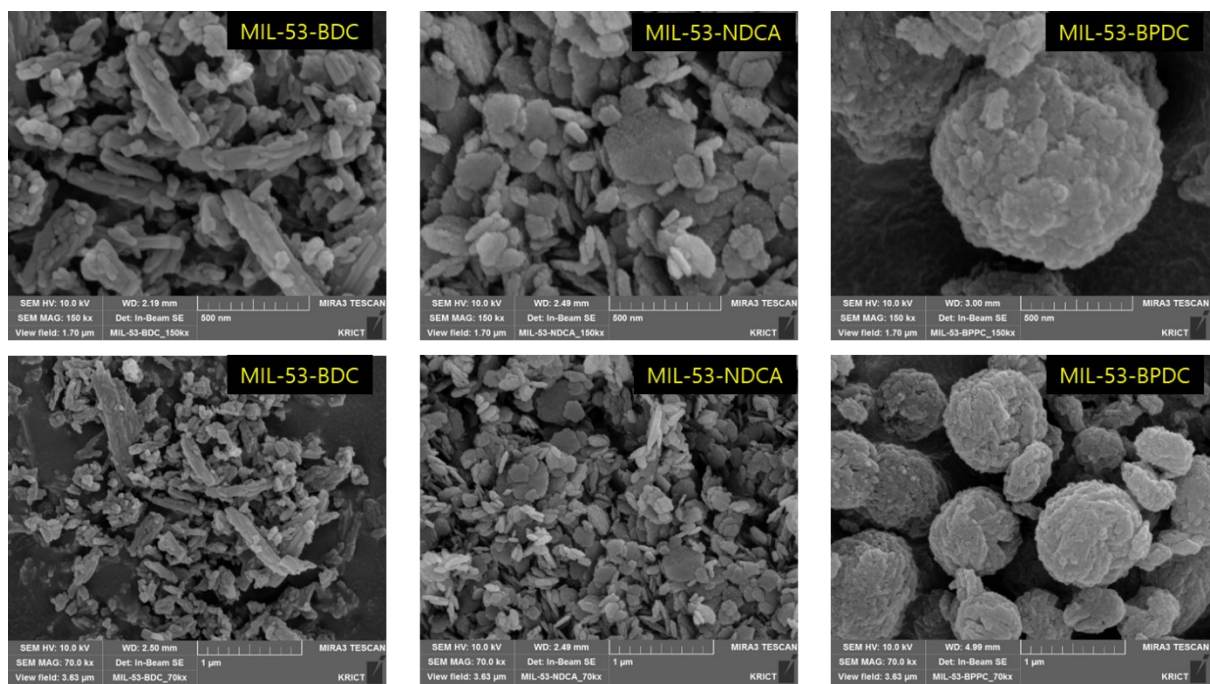

**Figure S1.** Scanning electron microscopy (SEM) images of MIL-53 isomorphs.

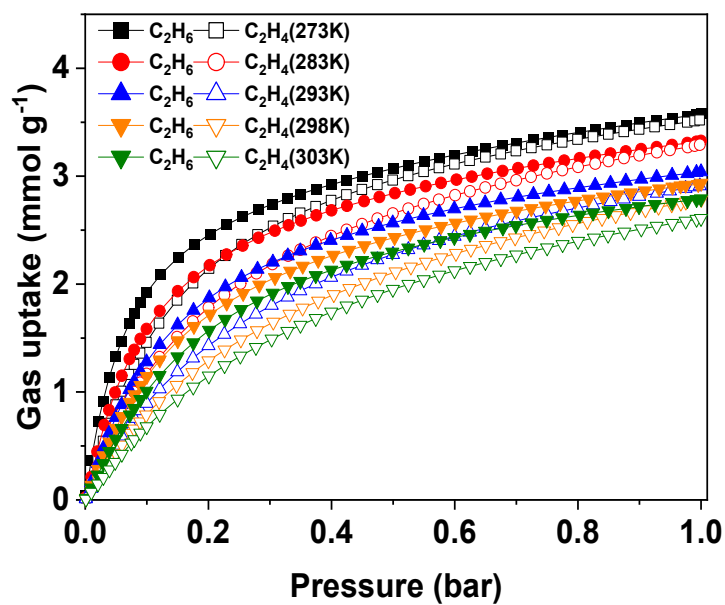

**Figure S2.** Single-component C<sub>2</sub>H<sub>6</sub> and C<sub>2</sub>H<sub>4</sub> adsorption isotherms of MIL-53-BDC at five different temperatures (273–303 K).

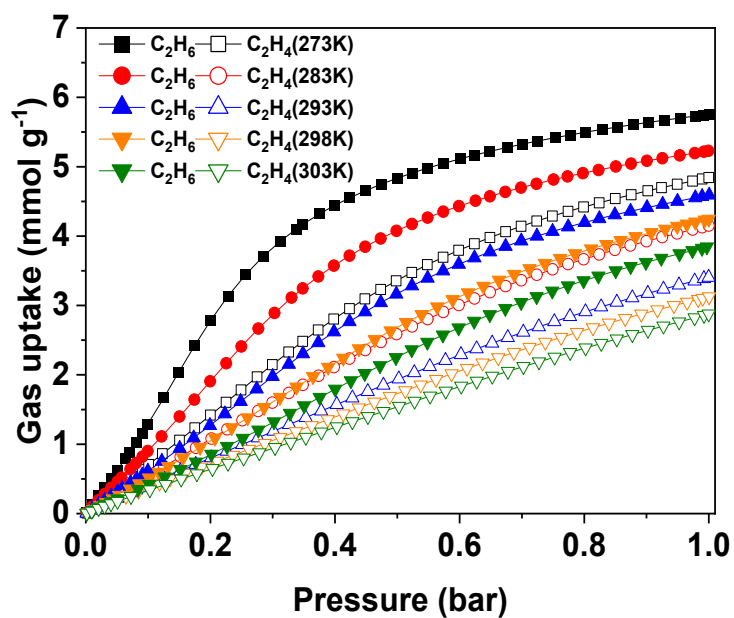

**Figure S3.** Single-component C<sub>2</sub>H<sub>6</sub> and C<sub>2</sub>H<sub>4</sub> adsorption isotherms of MIL-53-NDCA at five different temperatures (273–303 K).

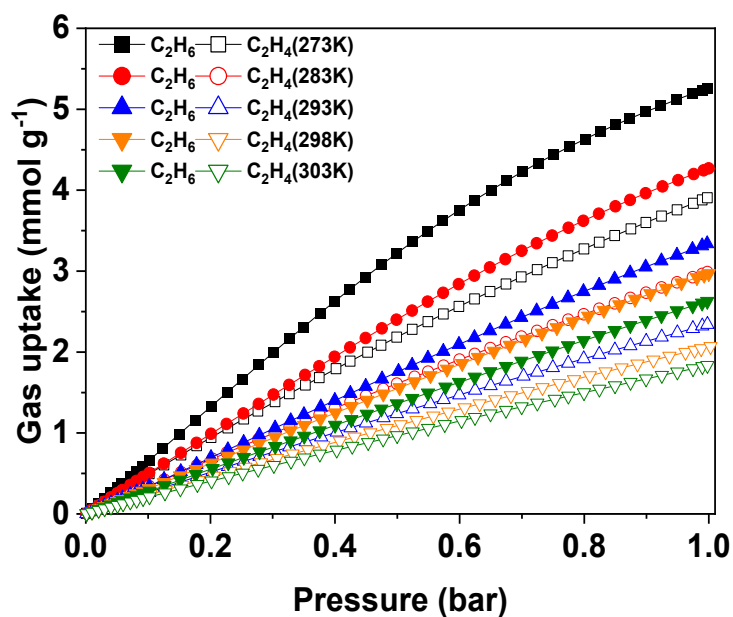

**Figure S4.** Single-component C<sub>2</sub>H<sub>6</sub> and C<sub>2</sub>H<sub>4</sub> adsorption isotherms of MIL-53-BPDC at five different temperatures (273–303 K).

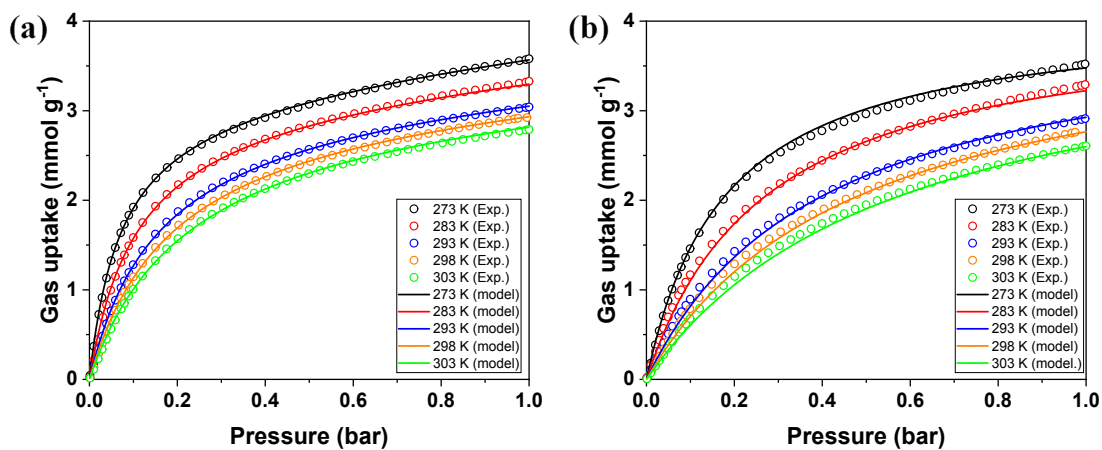

**Figure S5.** (a) The fitting results of the C<sub>2</sub>H<sub>6</sub> isotherms of MIL-53-BDC with the dual-site Langmuir-Freundlich (DSLFF) model. (b) The fitting results of the C<sub>2</sub>H<sub>4</sub> isotherms of MIL-53-BDC with the Langmuir-Freundlich (LF) model.

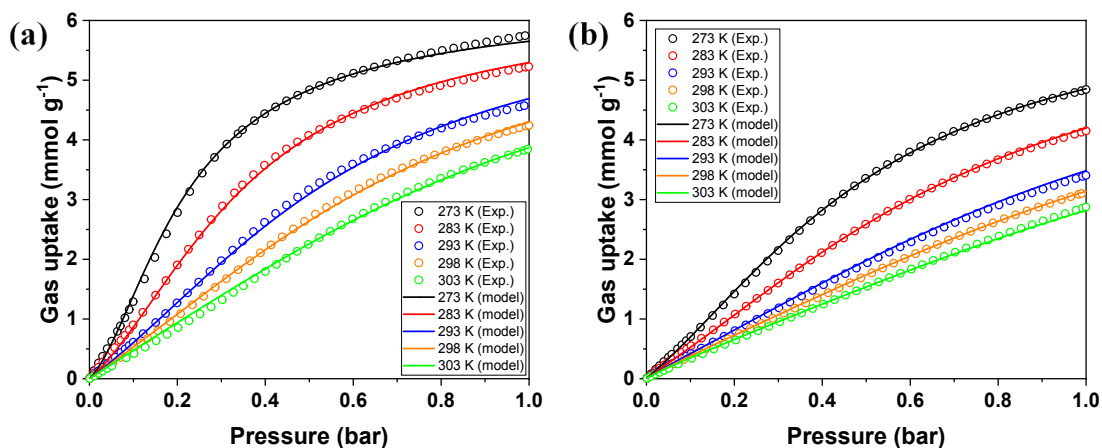

**Figure S6.** (a) The fitting results of the  $\text{C}_2\text{H}_6$  isotherms and (b) the  $\text{C}_2\text{H}_4$  isotherms of MIL-53-NDCA with the dual-site Langmuir-Freundlich (DSLFF) model.

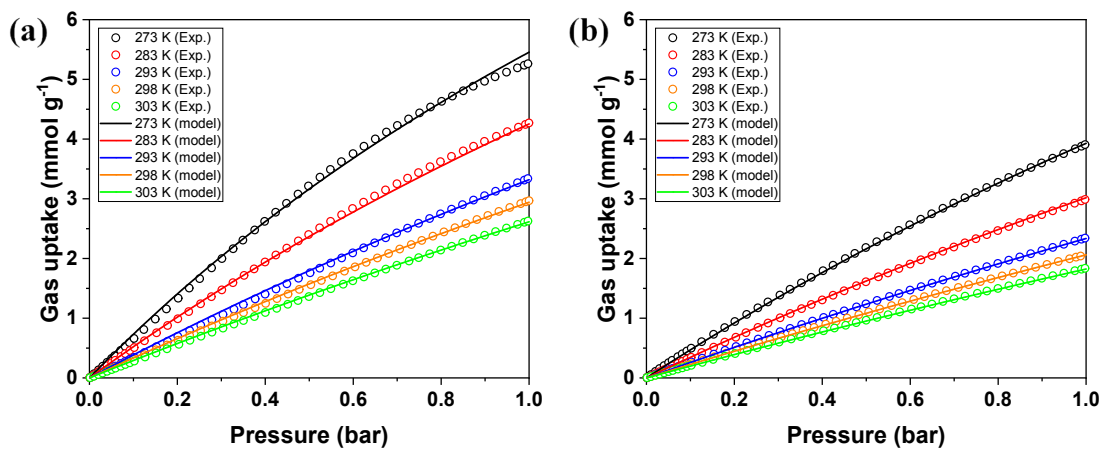

**Figure S7.** (a) The fitting results of the  $\text{C}_2\text{H}_6$  isotherms of MIL-53-BPDC with the dual-site Langmuir-Freundlich (DSLFF) model. (b) The fitting results of the  $\text{C}_2\text{H}_4$  isotherms of MIL-53-BPDC with the Langmuir-Freundlich (LF) model.



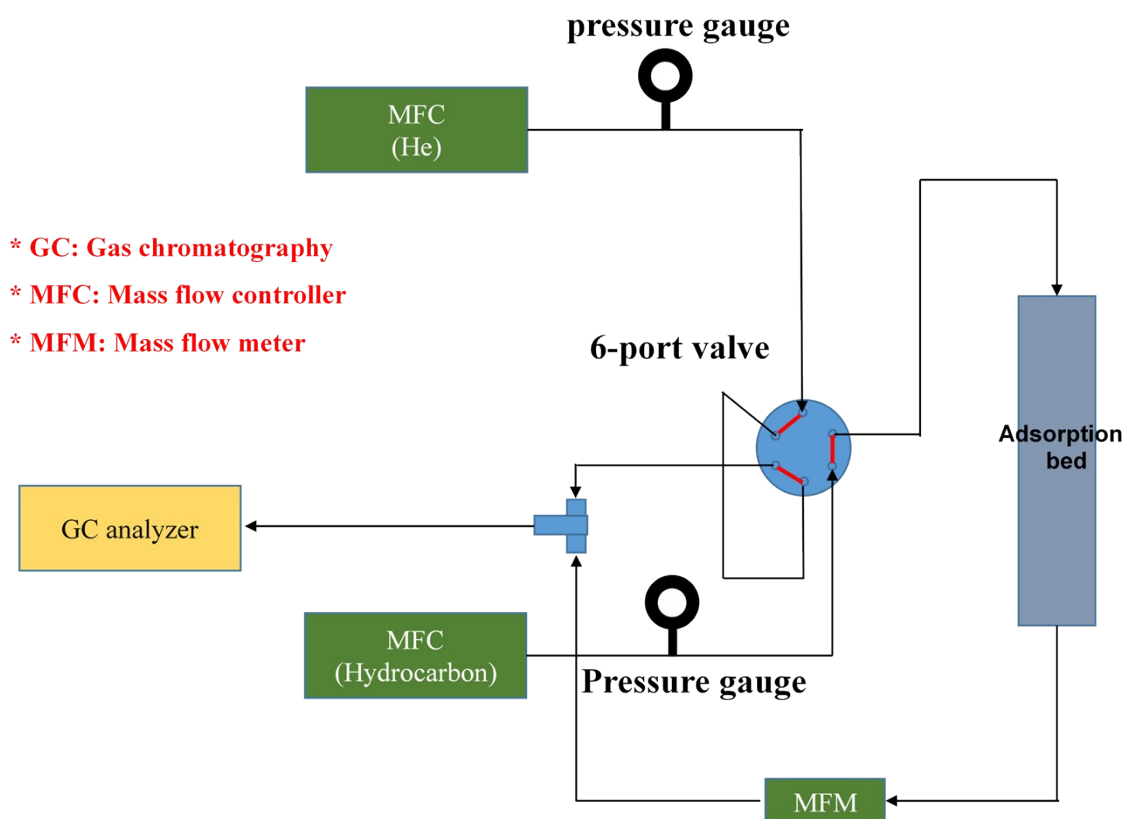

**Figure S8.** Schematic representation of the breakthrough setup.

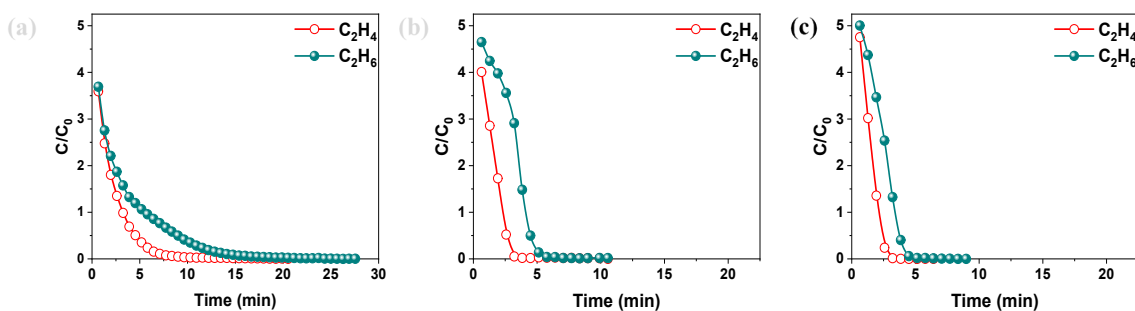

**Figure S9.**  $C_2H_4$  and  $C_2H_6$  desorption profiles of (a) MIL-53-BDC, (b) MIL-53-NDCA, and (c) MIL-53-BPDC at 298 K under a He flow ( $30 \text{ cm}^3 \text{ min}^{-1}$ ).

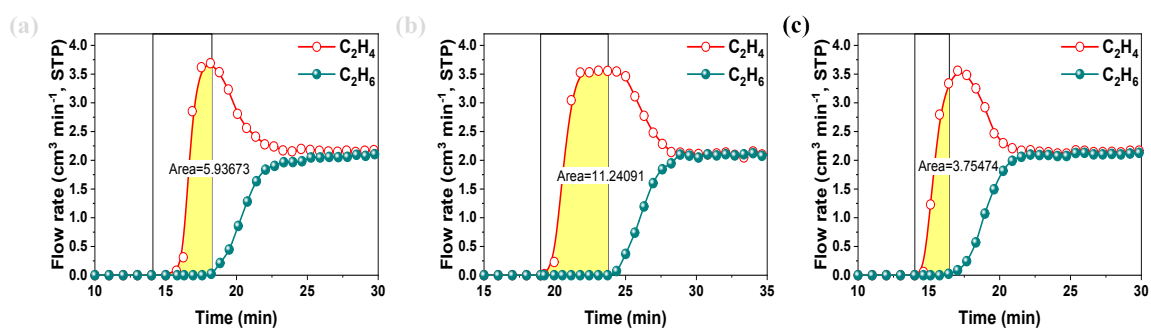

**Figure S10.** Outlet flow rate (the gas volume is based on STP) of  $\text{C}_2\text{H}_6$  and  $\text{C}_2\text{H}_4$  in the breakthrough experiments with (a) MIL-53-BDC, (b) MIL-53-NDCA, and (c) MIL-53-BPDC. The integrated area (yellow) represents the produced volume of high-purity  $\text{C}_2\text{H}_4$  (>99.95%).

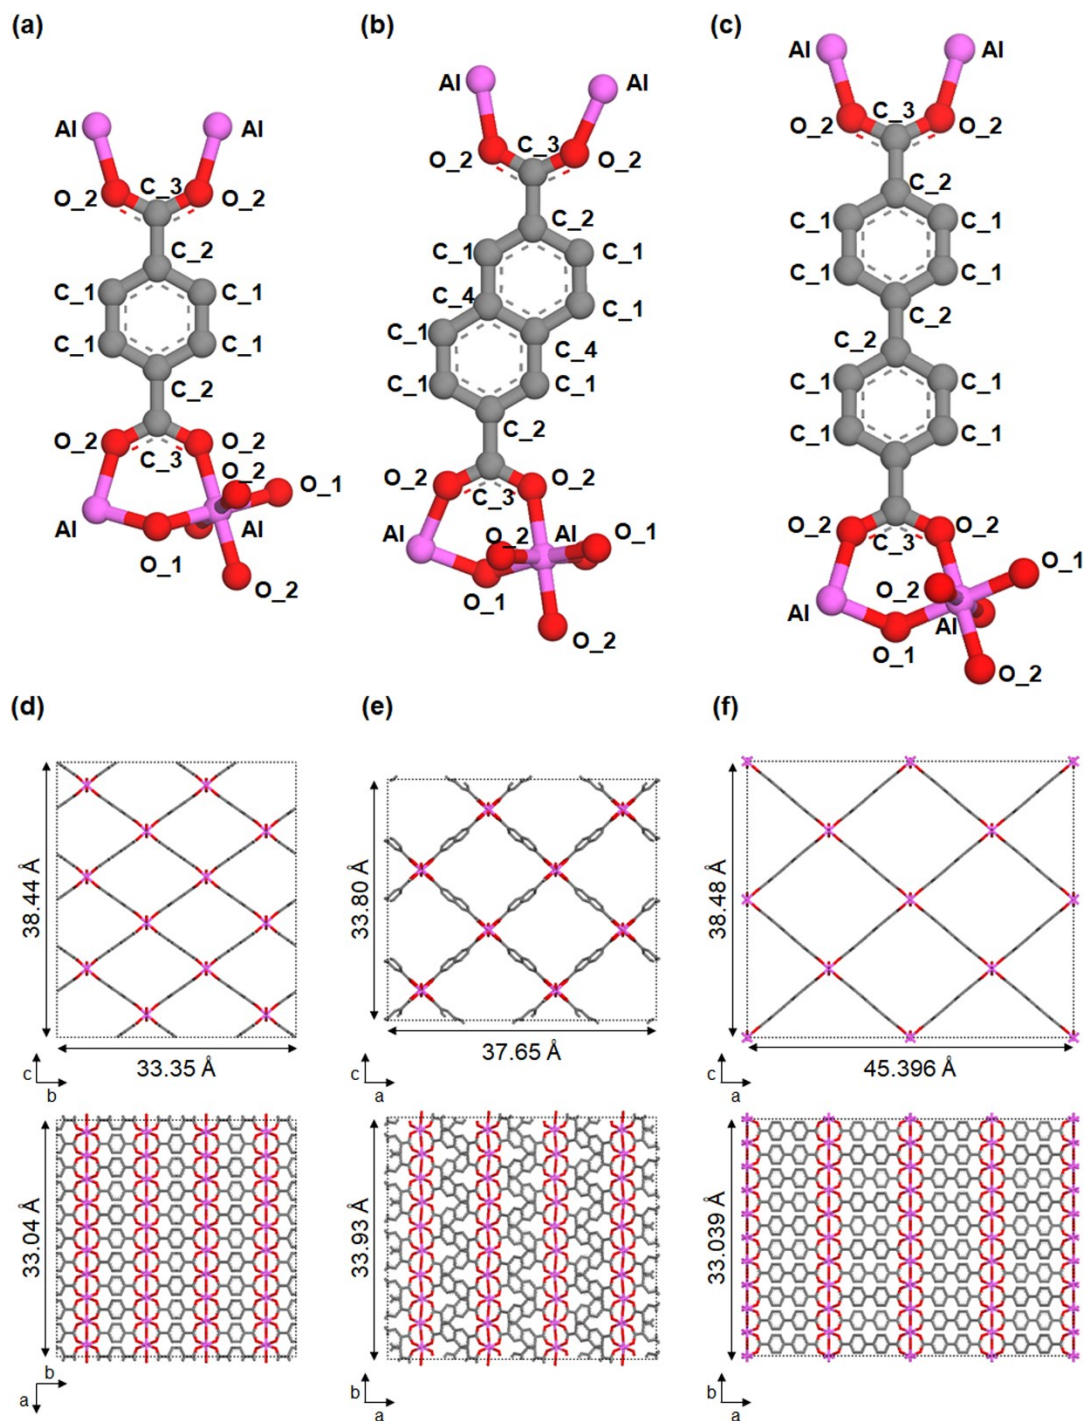

**Figure S11.** Atom types of potential energy parameters consisting of (a) MIL-53-BDC, (b) MIL-53-NDCA, and (c) MIL-53-BPDC. Front (*top*) and top (*bottom*) views of GCMC simulation models of (d) MIL-53-BDC, (e) MIL-53-NDCA, and (f) MIL-53-BPDC. Carbon, oxygen, and aluminum atoms are colored in grey, red, and pink, respectively.

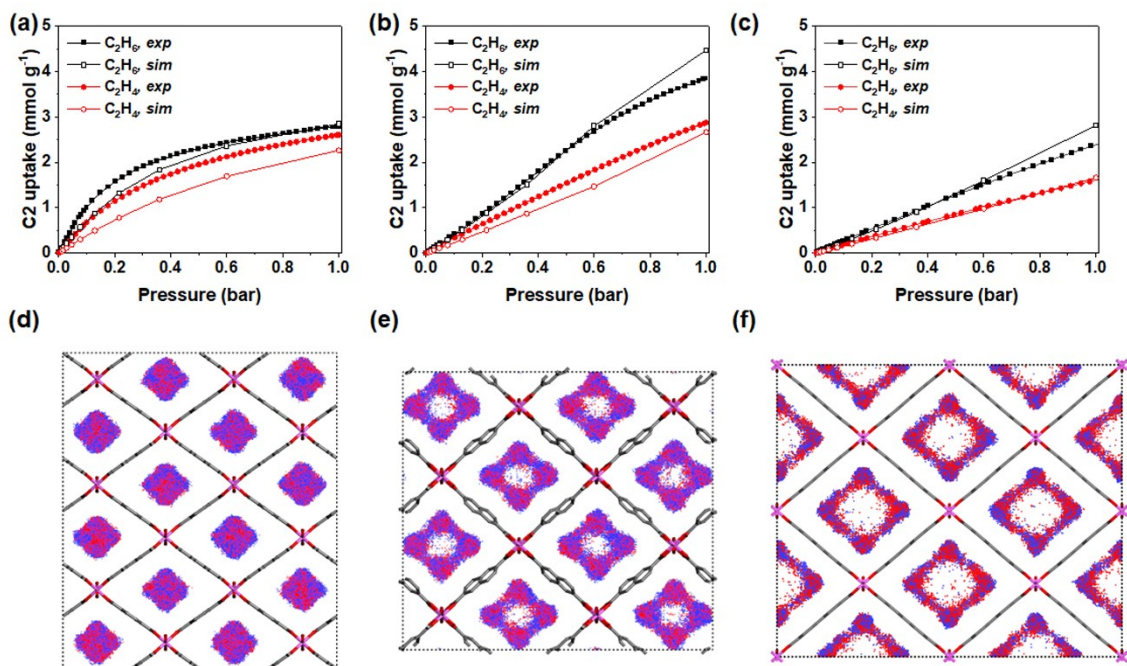

**Figure S12.** Adsorption isotherms of C<sub>2</sub>H<sub>6</sub> and C<sub>2</sub>H<sub>4</sub> on (a) MIL-53-BDC, (b) MIL-53-NDCA, and (c) MIL-53-BPDC at 303 K. The experimental (closed symbol) and simulation (open symbol) adsorption isotherms are compared. Density fields of adsorbed C<sub>2</sub>H<sub>6</sub> (red dots) and C<sub>2</sub>H<sub>4</sub> (blue dots) on (d) MIL-53-BDC, (e) MIL-53-NDCA, and (f) MIL-53-BPDC at 303 K and 1 bar. For (d), (e), and (f), carbon, oxygen, and aluminum atoms are colored in grey, red, and pink, respectively.

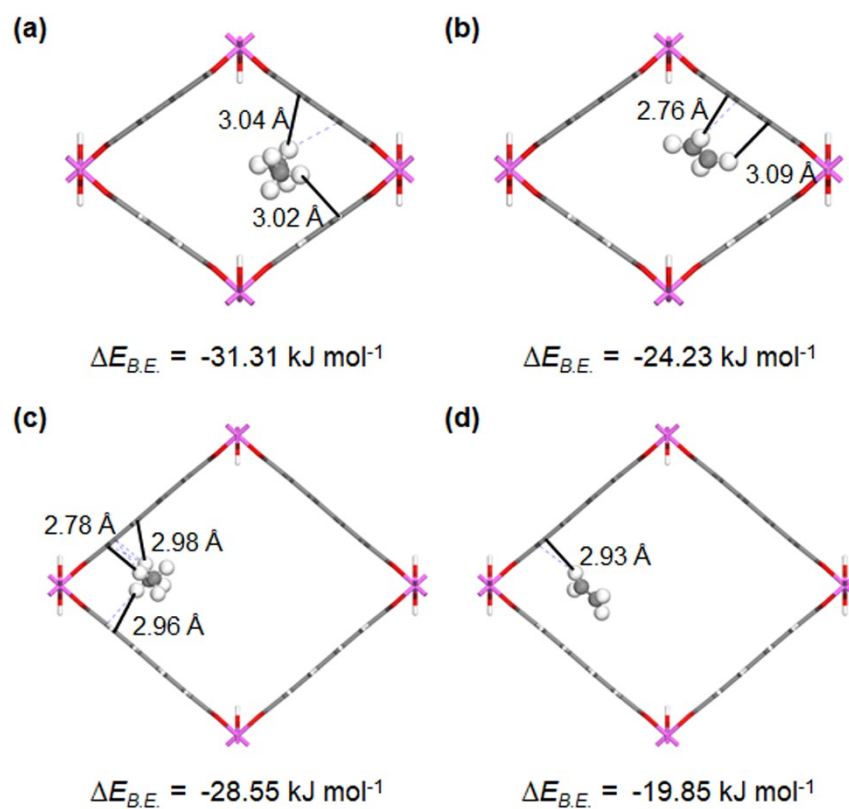

**Figure S13.** Optimized configurations and binding energies of (a)  $\text{C}_2\text{H}_6$  and (b)  $\text{C}_2\text{H}_4$  at Site I in MIL-53-BDC and (c)  $\text{C}_2\text{H}_6$  and (d)  $\text{C}_2\text{H}_4$  at Site I in MIL-53-BPDC. Carbon, hydrogen, oxygen, and aluminum atoms are colored in grey, white, red, and pink, respectively.

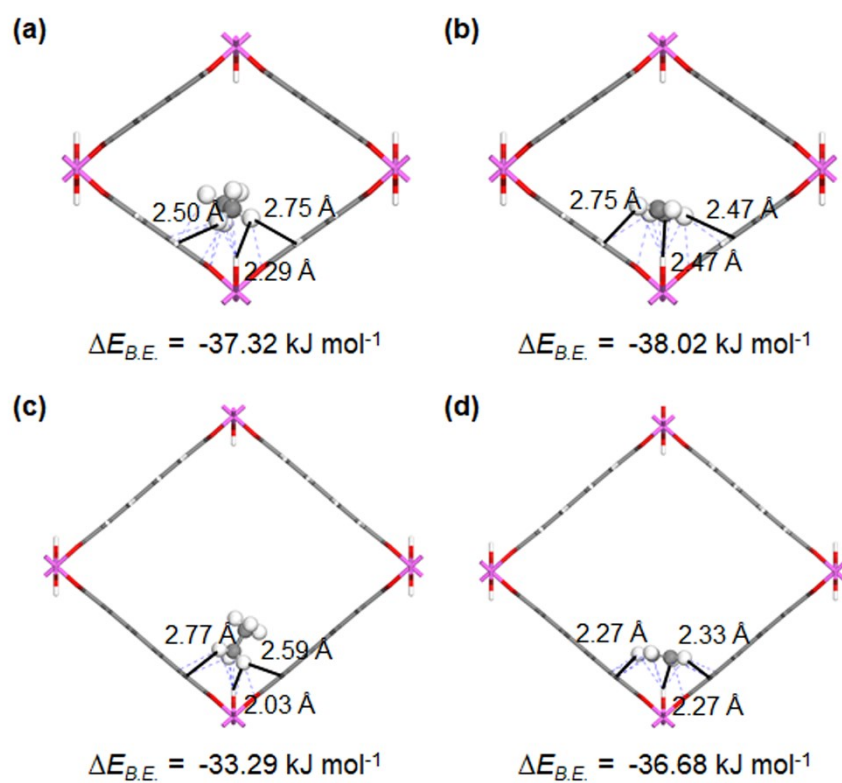

**Figure S14.** Optimized configurations and binding energies of (a)  $\text{C}_2\text{H}_6$  and (b)  $\text{C}_2\text{H}_4$  at Site II in MIL-53-BDC and (c)  $\text{C}_2\text{H}_6$  and (d)  $\text{C}_2\text{H}_4$  at Site II in MIL-53-BPDC. Carbon, hydrogen, oxygen, and aluminum atoms are colored in grey, white, red, and pink, respectively.

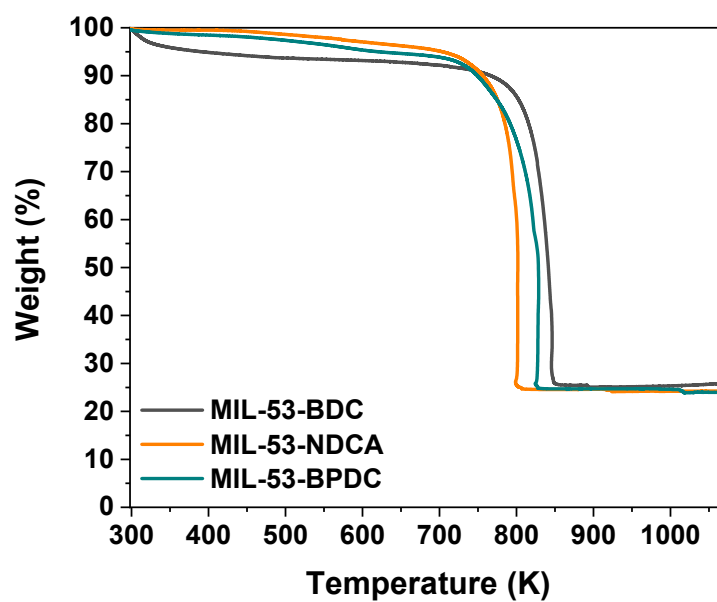

**Figure S15.** Thermogravimetric analysis of MIL-53 isomorphs under N<sub>2</sub> (temperature ramp: 5 K min<sup>-1</sup>).

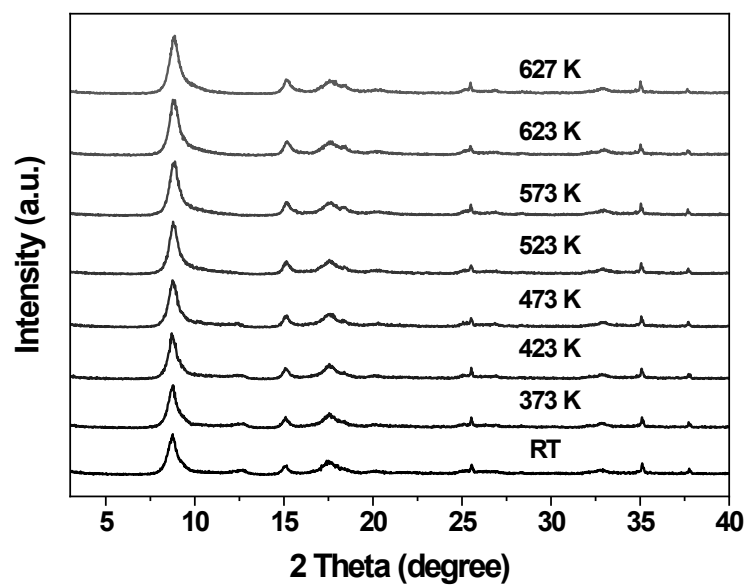

**Figure S16.** High-temperature PXRD patterns of MIL-53-BDC measured under  $30 \text{ cm}^3 \text{ min}^{-1}$  He flow.

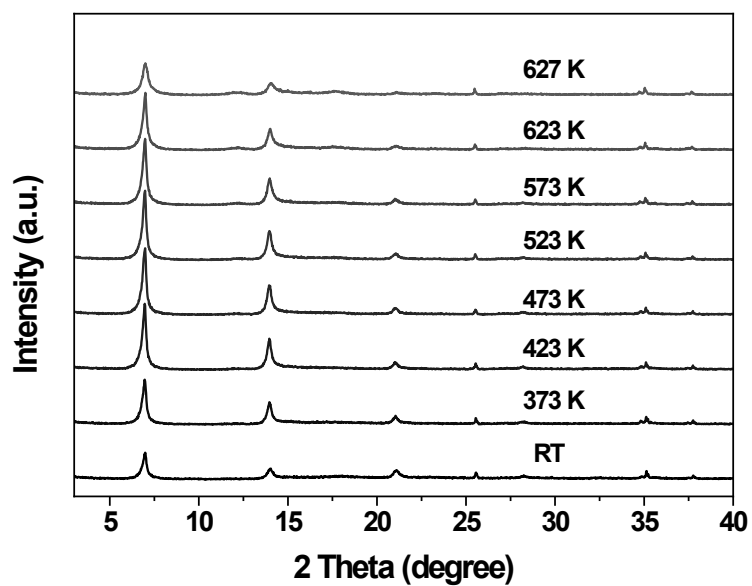

**Figure S17.** High-temperature PXRD patterns of MIL-53-NDCA measured under  $30 \text{ cm}^3 \text{ min}^{-1}$  He flow.



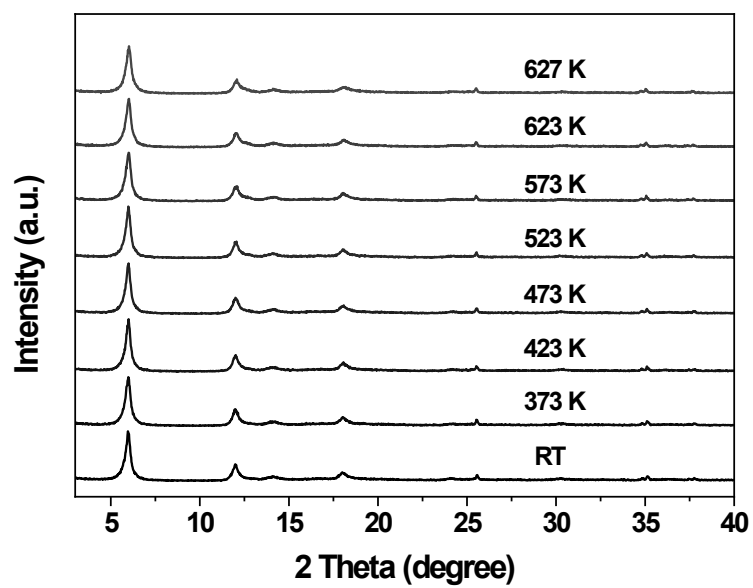

**Figure S18.** High-temperature PXRD patterns of MIL-53-BPDC measured under  $30 \text{ cm}^3 \text{ min}^{-1}$  He flow.

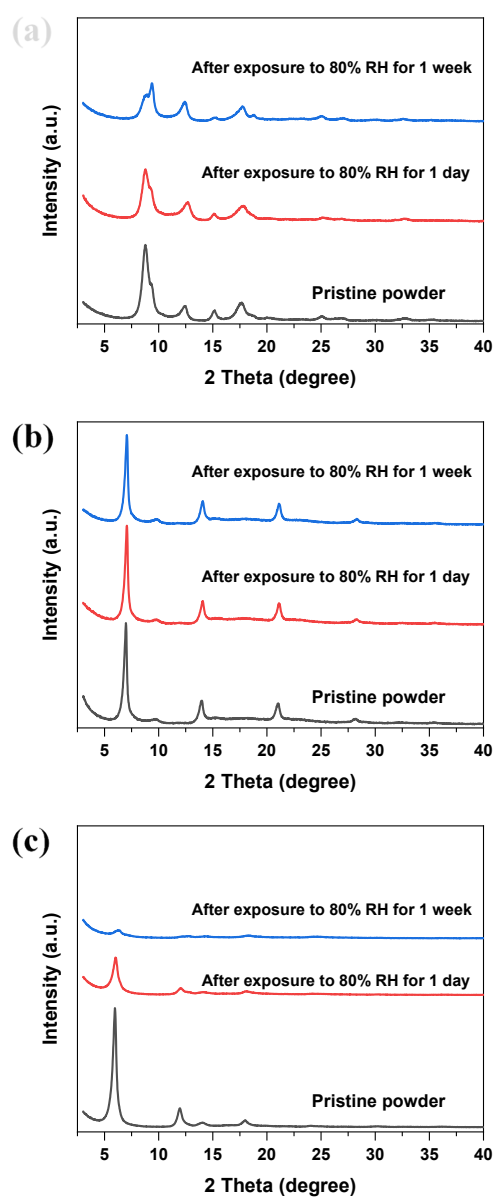

**Figure S19.** PXRD patterns of (a) MIL-53-BDC, (b) MIL-53-NDCA and (c) MIL-53-BPDC after exposure to 80% relative humidity at 298 K.

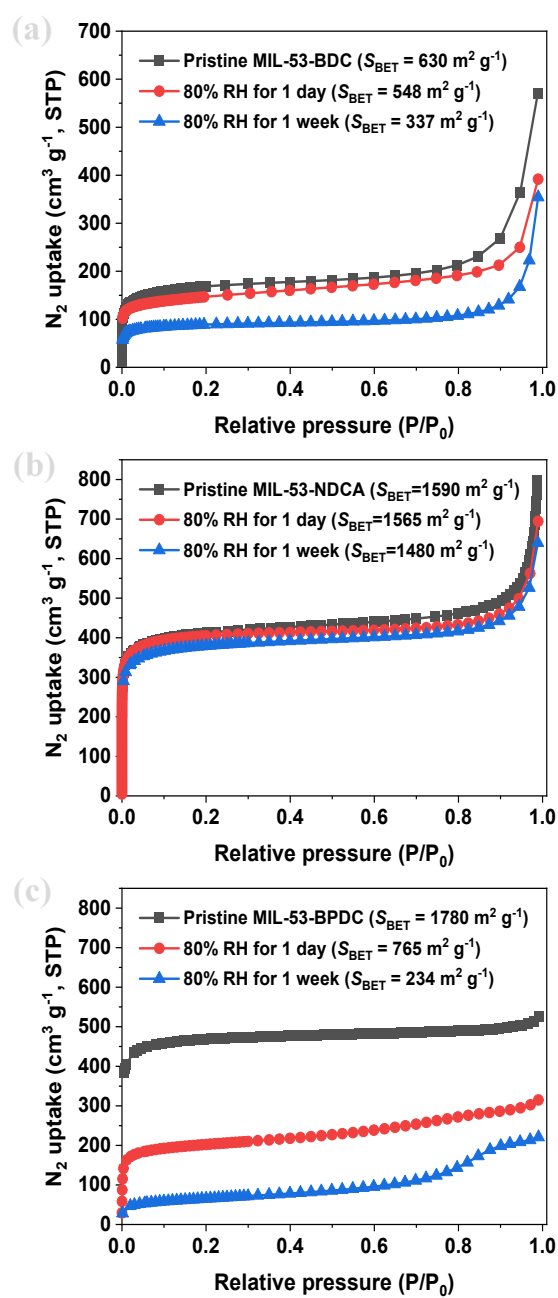

**Figure S20.**  $N_2$  adsorption isotherms of (a) MIL-53-BDC, (b) MIL-53-NDCA, and (c) MIL-53-BPDC after exposure to 80% relative humidity at 298 K.

**Table S1.** Theoretical/experimentally determined chemical compositions (using EA and ICP) and pore structural properties of the MIL-53 isomorphs.

| Samples     | Theoretical composition (wt%) |       |      | Experimentally determined composition (wt%) |       |      |      | Structural formula                          | $S_{\text{BET}}^{\text{a}}$<br>( $\text{m}^2 \text{g}^{-1}$ ) | $V_{\text{micro}}^{\text{b}}$<br>( $\text{cm}^3 \text{g}^{-1}$ ) |
|-------------|-------------------------------|-------|------|---------------------------------------------|-------|------|------|---------------------------------------------|---------------------------------------------------------------|------------------------------------------------------------------|
|             | Al                            | C     | H    | Al                                          | C     | H    | N    |                                             |                                                               |                                                                  |
| MIL-53-BDC  | 12.97                         | 46.2  | 2.4  | 13.3                                        | 43.34 | 2.61 | 0.36 | $\text{Al}(\text{OH})(\text{BDC})_{0.92}$   | 630                                                           | 0.222                                                            |
| MIL-53-NDCA | 10.45                         | 55.83 | 2.71 | 10.8                                        | 54.78 | 2.79 | 0.21 | $\text{Al}(\text{OH})(\text{NDCA})_{0.952}$ | 1590                                                          | 0.584                                                            |
| MIL-53-BPDC | 9.49                          | 59.16 | 3.17 | 10.5                                        | 57.71 | 3.16 | 0.08 | $\text{Al}(\text{OH})(\text{BPDC})_{0.88}$  | 1780                                                          | 0.614                                                            |

<sup>a</sup>Specific surface area ( $S_{\text{BET}}$ ) was calculated using the Brunauer–Emmett–Teller (BET) equation. <sup>b</sup>The micropore volume ( $V_{\text{micro}}$ ) was calculated using the  $t$ -plot method.

**Table S2.** Fitting results of the  $\text{C}_2\text{H}_6$  and  $\text{C}_2\text{H}_4$  adsorption isotherms of the MIL-53 isomorphs using the DSLF and LF models, respectively.

| Samples     | Adsorbate              | $q_{\text{m}}$ ( $\text{mol kg}^{-1}$ ) |                 | $K_{n,i}^0$ ( $\text{bar}^{-1}$ ) |                       | $-\Delta H$ ( $\text{kJ mol}^{-1}$ ) |                 | $n$            |                |
|-------------|------------------------|-----------------------------------------|-----------------|-----------------------------------|-----------------------|--------------------------------------|-----------------|----------------|----------------|
|             |                        | $q_{\text{m1}}$                         | $q_{\text{m2}}$ | $K_{1,i}^0$                       | $K_{2,i}^0$           | $(-\Delta H_1)$                      | $(-\Delta H_2)$ | $n_{\text{A}}$ | $n_{\text{B}}$ |
| MIL-53-BDC  | $\text{C}_2\text{H}_6$ | 3.11                                    | 3.75            | $1.47 \times 10^{-4}$             | $5.38 \times 10^{-6}$ | 26.08                                | 24.03           | 1              | 1              |
|             | $\text{C}_2\text{H}_4$ | 4.10                                    | -               | $4.09 \times 10^{-5}$             | -                     | 26.84                                | -               | 1              | -              |
| MIL-53-NDCA | $\text{C}_2\text{H}_6$ | 3.91                                    | 2.56            | $1.60 \times 10^{-11}$            | $3.91 \times 10^{-2}$ | 63.16                                | 9.91            | 1.87           | 1.02           |
|             | $\text{C}_2\text{H}_4$ | 4.71                                    | 1.82            | $9.57 \times 10^{-8}$             | $3.91 \times 10^{-2}$ | 39.3                                 | 9.29            | 1.68           | 0.92           |
| MIL-53-BPDC | $\text{C}_2\text{H}_6$ | 6.73                                    | 16.4            | $9.13 \times 10^{-7}$             | $3.44 \times 10^{-4}$ | 30.42                                | 14.63           | 1              | 1              |
|             | $\text{C}_2\text{H}_4$ | 21.54                                   | -               | $3.07 \times 10^{-5}$             | -                     | 20.18                                | -               | 1              | -              |

**Table S3.** Comparison of various adsorbents in terms of C<sub>2</sub>H<sub>6</sub> and C<sub>2</sub>H<sub>4</sub> adsorption capacity, C<sub>2</sub>H<sub>6</sub>/C<sub>2</sub>H<sub>4</sub> selectivity, isosteric heat of adsorption, and C<sub>2</sub>H<sub>4</sub> productivity over 99.95% purity at 1 bar.

| Adsorbent                              | T (K) | $q_{\text{C}_2\text{H}_6}$<br>(mmol g <sup>-1</sup> ) | $q_{\text{C}_2\text{H}_4}$<br>(mmol g <sup>-1</sup> ) | Selectivity <sup>a</sup> | $-Q_{\text{st}, \text{C}_2\text{H}_6}$<br>(kJ mol <sup>-1</sup> ) | $-Q_{\text{st}, \text{C}_2\text{H}_4}$<br>(kJ mol <sup>-1</sup> ) | Productivity<br>of C <sub>2</sub> H <sub>4</sub><br>(99.95%) <sup>d</sup> | Ref.      |
|----------------------------------------|-------|-------------------------------------------------------|-------------------------------------------------------|--------------------------|-------------------------------------------------------------------|-------------------------------------------------------------------|---------------------------------------------------------------------------|-----------|
| ZIF-7                                  | 298   | 1.83                                                  | 1.80                                                  | 1.5                      | -                                                                 | -                                                                 | 2                                                                         | 3         |
| ZIF-8                                  | 293   | 2.52                                                  | 1.51                                                  | 1.7                      | -                                                                 | -                                                                 | 0.4                                                                       | 4         |
| ZIF-4                                  | 298   | 2.3                                                   | 2.2                                                   | 2.15                     | -                                                                 | -                                                                 | 6.6                                                                       | 5         |
| IRMOF-8                                | 298   | 4.5                                                   | 3.1                                                   | 1.78                     | 52.5                                                              | 49.5                                                              | -                                                                         | 6         |
| MAF-49                                 | 316   | 1.7                                                   | 1.7                                                   | 2.7                      | 56.7                                                              | 45.5                                                              | 5.3                                                                       | 7         |
| MIL-142A                               | 298   | 3.8                                                   | 2.9                                                   | 1.5                      | 25.1                                                              | 23.8                                                              | 6.7                                                                       | 8         |
| BasoliteA100                           | 303   | 2.5                                                   | 1.6                                                   | 1.65                     | 29.0                                                              | 27.0                                                              | -                                                                         | 9         |
| MIL-53-FA                              | 308   | 3.7                                                   | 3.35                                                  | 1.9                      | 29.0                                                              | 27.0                                                              | -                                                                         | 10        |
| Fe <sub>2</sub> O <sub>2</sub> (DOBDC) | 298   | 3.3                                                   | 2.6                                                   | 4.4                      | 66.8                                                              | 37.0                                                              | 19.3                                                                      | 11        |
| PCN-245                                | 298   | 3.27                                                  | 2.39                                                  | 1.9 <sup>b</sup>         | 23.0                                                              | 20.5                                                              | 5.8                                                                       | 12        |
| PCN-250                                | 298   | 5.21                                                  | 4.22                                                  | 1.9                      | 23.6                                                              | 21.1                                                              | 10                                                                        | 13        |
| MUF-15                                 | 293   | 4.69                                                  | 4.15                                                  | 1.95                     | 37.5                                                              | 33.0                                                              | 14.0                                                                      | 14        |
| Cu(Qc) <sub>2</sub>                    | 298   | 1.9                                                   | 0.8                                                   | 3.7                      | 29.0                                                              | 25.4                                                              | 4.34                                                                      | 15        |
| UTSA-35a                               | 296   | 2.43                                                  | 2.16                                                  | 1.4                      | 29.0                                                              | 28.9                                                              | -                                                                         | 16        |
| UiO-66-ADC                             | 298   | 1.6                                                   | 1.7                                                   | 1.8                      | 36.0                                                              | 36.0                                                              | -                                                                         | 17        |
| UiO-66-2CF <sub>3</sub>                | 318   | 0.6                                                   | 0.5                                                   | 2.5                      | 28.0                                                              | 5.0                                                               | -                                                                         | 18        |
| NiBDC(TED) <sub>0.5</sub>              | 293   | 5.00                                                  | 3.4                                                   | 1.6                      | 21.5                                                              | 18.5                                                              | -                                                                         | 19        |
| NiTMBCD(TED) <sub>0.5</sub>            | 298   | 5.45                                                  | 5.02                                                  | 1.99 <sup>c</sup>        | 39                                                                | 32                                                                | -                                                                         | 20        |
| ZJU-120a                               | 296   | 4.91                                                  | 3.93                                                  | 2.74                     | 27.6                                                              | 26.5                                                              | 8.39                                                                      | 21        |
| CPM-733                                | 298   | 7.12                                                  | 6.37                                                  | 1.75                     | 23.3                                                              | 22.5                                                              | 19.71                                                                     | 22        |
| MIL-53-BDC                             | 298   | 2.93                                                  | 2.78                                                  | 1.70                     | 27.2                                                              | 22.3                                                              | 5.3                                                                       | This work |
| MIL-53-NDCA                            | 298   | 4.24                                                  | 3.12                                                  | 1.53                     | 24.2                                                              | 17.0                                                              | 11.2                                                                      | This work |
| MIL-53-BPDC                            | 298   | 2.97                                                  | 2.07                                                  | 1.47                     | 22.1                                                              | 22.1                                                              | 3.5                                                                       | This work |

<sup>a</sup> Selectivity calculated by IAST for an equimolar mixture of C<sub>2</sub>H<sub>6</sub>/C<sub>2</sub>H<sub>4</sub> at 1 bar

<sup>b</sup> For C<sub>2</sub>H<sub>6</sub>/C<sub>2</sub>H<sub>4</sub> (1/9 v/v)

<sup>c</sup> For C<sub>2</sub>H<sub>6</sub>/C<sub>2</sub>H<sub>4</sub> (1/15 v/v)

<sup>d</sup> Calculated based on the breakthrough experiments using a C<sub>2</sub>H<sub>6</sub>/C<sub>2</sub>H<sub>4</sub> (50/50 v/v) mixture gas

**Table S4.** Potential energy parameters of Lennard-Jones 12-6 potential,  $E(R) = D_0 \left( \left( \frac{R_0}{R} \right)^{12} - 2 \left( \frac{R_0}{R} \right)^6 \right)$ , adopted

from TraPPE-UA. Atom types are corresponding to **Fig. S11a–c**.

| Atom type         | $R_0$ (Å) | $D_0$ (kcal/mol) | Ref. |
|-------------------|-----------|------------------|------|
| Al                | 0         | 0                | 23   |
| O_1               | 3.3898    | 0.1848           | 24   |
| O_2               | 3.1429    | 0.1093           | 25   |
| C_1               | 4.1475    | 0.1004           | 26   |
| C_2               | 4.3552    | 0.0417           | 26   |
| C_3               | 4.3215    | 0.0397           | 27   |
| C_4               | 4.1531    | 0.0596           | 26   |
| C_CH <sub>3</sub> | 4.2092    | 0.1947           | 28   |
| C_CH <sub>2</sub> | 4.125     | 0.1689           | 26   |

## References

1. A. L. Myers and J. M. Prausnitz, *AIChE J.*, 1965, **11**, 121.
2. S. J. Caldwell, B. Al-Duri, N. Sun, C.-g. Sun, C. E. Snape, K. Li and J. Wood, *Energy Fuels*, 2015, **29**, 3796.
3. C. Gücüyener, J. van den Bergh, J. Gascon and F. Kapteijn, *J. Am. Chem. Soc.*, 2010, **132**, 17704.
4. U. Bohme, B. Barth, C. Paula, A. Kuhnt, W. Schwieger, A. Mundstock, J. Caro and M. Hartmann, *Langmuir*, 2013, **29**, 8592.
5. M. Hartmann, U. Bohme, M. Hovestadt and C. Paula, *Langmuir*, 2015, **31**, 12382.
6. J. Pires, M. L. Pinto and V. K. Saini, *ACS Appl. Mater. Interfaces*, 2014, **6**, 12093.
7. P. Q. Liao, W. X. Zhang, J. P. Zhang and X. M. Chen, *Nat. Commun.*, 2015, **6**, 8697.
8. Y. Chen, H. Wu, D. Lv, R. Shi, Y. Chen, Q. Xia and Z. Li, *Ind. Eng. Chem. Res.*, 2018, **57**, 4063.
9. R. P. P. L. Ribeiro, B. C. R. Camacho, A. Lyubchik, I. A. A. C. Esteves, F. J. A. L. Cruz and J. P. B. Mota, *Micropor. Mesopor. Mater.*, 2016, **230**, 154.
10. J. Peng, Y. Sun, Y. Wu, Z. Lv and Z. Li, *Ind. Eng. Chem. Res.*, 2019, **58**, 8290.
11. L. Li, R. B. Lin, R. Krishna, H. Li, S. Xiang, H. Wu, J. Li, W. Zhou and B. Chen, *Science*, 2018, **362**, 443.
12. D. Lv, R. Shi, Y. Chen, Y. Wu, H. Wu, H. Xi, Q. Xia and Z. Li, *ACS Appl. Mater. Interfaces*, 2018, **10**, 8366.
13. Y. Chen, Z. Qiao, H. Wu, D. Lv, R. Shi, Q. Xia, J. Zhou and Z. Li, *Chem. Eng. Sci.*, 2018, **175**, 110.
14. O. T. Qazvini, R. Babarao, Z. L. Shi, Y. B. Zhang and S. G. Telfer, *J. Am. Chem. Soc.*, 2019, **141**, 5014.
15. R. B. Lin, H. Wu, L. Li, X. L. Tang, Z. Li, J. Gao, H. Cui, W. Zhou and B. Chen, *J. Am. Chem. Soc.*, 2018, **140**, 12940.
16. Y. He, Z. Zhang, S. Xiang, F. R. Fronczek, R. Krishna and B. Chen, *Chem. Commun.*, 2012, **48**, 6493.
17. Y. Wang, S. Yuan, Z. Hu, T. Kundu, J. Zhang, S. B. Peh, Y. Cheng, J. Dong, D. Yuan, H.-C. Zhou and D. Zhao, *ACS Sustain. Chem. Eng.*, 2019, **7**, 7118.
18. J. Pires, J. Fernandes, K. Dedeker, J. R. B. Gomes, G. Perez-Sanchez, F. Nouar, C. Serre and M. L. Pinto, *ACS Appl. Mater. Interfaces*, 2019, **11**, 27410.
19. H. Xiang, A. Ameen, P. Gorgojo, F. R. Siperstein, S. M. Holmes and X. Fan, *Micropor. Mesopor. Mater.*, 2020, **292**, 109724.
20. X. Wang, Z. Niu, A. M. Al-Enizi, A. Nafady, Y. Wu, B. Aguila, G. Verma, L. Wojtas, Y.-S. Chen, Z. Li and S. Ma, *J. Mater. Chem. A*, 2019, **7**, 13585.
21. J. Pei, J.-X. Wang, K. Shao, Y. Yang, Y. Cui, H. Wu, W. Zhou, B. Li and G. Qian, *J. Mater. Chem. A*, 2020, **8**, 3613.
22. H. Yang, Y. Wang, R. Krishna, X. Jia, Y. Wang, A. N. Hong, C. Dang, H. E. Castillo, X. Bu and P. Feng, *J. Am. Chem. Soc.*, 2020, **142**, 2222.
23. N. A. Ramsahye, G. Maurin, S. Bourrelly, P. L. Llewellyn, T. Loiseau, C. Serre and G. Férey, *Chem. Commun.*, 2007, DOI: 10.1039/B702986A, 3261.
24. B. Chen, J. J. Potoff and J. I. Siepmann, *J. Phys. Chem. B*, 2001, **105**, 3093.
25. J. M. Stubbs, J. J. Potoff and J. I. Siepmann, *J. Phys. Chem. B*, 2004, **108**, 17596.
26. C. D. Wick, M. G. Martin and J. I. Siepmann, *J. Phys. Chem. B*, 2000, **104**, 8008.
27. G. Kamath, F. Cao and J. J. Potoff, *J. Phys. Chem. B*, 2004, **108**, 14130.
28. M. G. Martin and J. I. Siepmann, *J. Phys. Chem. B*, 1998, **102**, 2569.
